# Supplementary material
Source: Springer Nature journal article supplement (https://www.springermedizin.de/resource/supplementary/12946_2011_144_MOESM9_ESM.pdf/9555258)

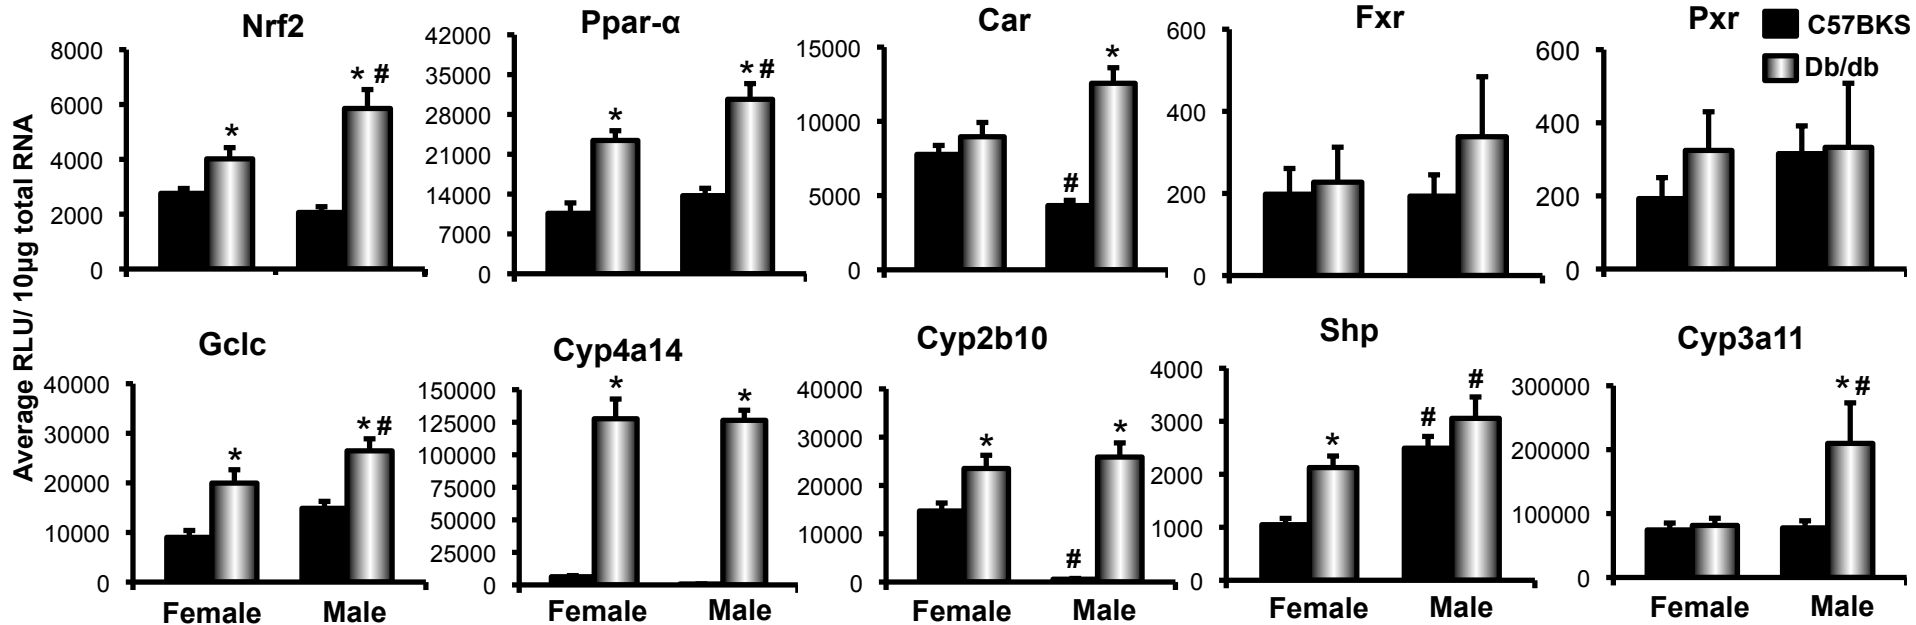

Supplement: MOESM9 [file 9555258]
